# Supplementary material for: Capturing the spatiotemporal spread of COVID-19 in 30 European countries during 2020 – 2022
Source: Research Square preprint supplement (doi:10.21203/rs.3.rs-6770961/v1), 2025-06-17
Supplement: Supplementary file 1 [file 08501d1af4967e206a49cc6a.xlsx]

## Sheet: Appendix Table A1
Appendix Table A1: Component contribution in percentages from model estimates and from the true parameter estimates across different simulated scenarios.
Scenario	Estimate from	Mean	SD	Min	Median	Max
The autoregressive component
Scenario_0	SIMULATION	94.5582	2.62464	87.2875	94.073	99.615
Scenario_0	TRUE	94.767	2.36724	87.9326	94.2757	99.634
Scenario_1	SIMULATION	20.9889	2.98631	13.4929	20.947	28.5726
Scenario_1	TRUE	21.148	0.653977	19.8515	21.1004	23.5192
Scenario_2	SIMULATION	42.795	2.78825	37.1557	42.5767	50.8869
Scenario_2	TRUE	43.5428	1.09204	41.3183	43.4605	46.7413
Scenario_3	SIMULATION	4.74038	2.25517	0.000642652	4.56342	10.7297
Scenario_3	TRUE	5.33732	0.0712786	5.19841	5.33528	5.49092
Scenario_4	SIMULATION	5.68556	2.67458	0.276643	5.67766	15.2633
Scenario_4	TRUE	5.84379	0.0700032	5.72088	5.83869	6.02314
Scenario_5	SIMULATION	34.2225	2.32607	28.3632	34.2323	40.4458
Scenario_5	TRUE	34.7307	0.391049	33.8604	34.7104	35.7729
Scenario_6	SIMULATION	7.54781	2.29089	1.03119	7.3505	11.9218
Scenario_6	TRUE	8.10139	0.137721	7.71833	8.09089	8.54038
Scenario_7	SIMULATION	38.9871	2.38008	33.9942	38.8212	46.7152
Scenario_7	TRUE	39.7007	0.67309	38.3547	39.6938	42.6166
The endemic component
Scenario_0	SIMULATION	4.99515	2.54898	0.181433	5.62174	12.0113
Scenario_0	TRUE	4.84081	2.35253	0.170315	5.41447	11.7372
Scenario_1	SIMULATION	78.698	2.98771	71.0803	78.6822	86.1358
Scenario_1	TRUE	78.5508	0.657818	76.1473	78.5895	79.8604
Scenario_2	SIMULATION	49.6667	3.55525	41.3863	49.9348	57.9171
Scenario_2	TRUE	49.0205	2.62647	41.3842	49.4473	53.5678
Scenario_3	SIMULATION	65.5898	2.64527	57.6059	66.061	71.0013
Scenario_3	TRUE	65.0909	1.52367	60.1081	65.0509	68.2008
Scenario_4	SIMULATION	58.5885	2.90667	52.3828	58.4554	65.1229
Scenario_4	TRUE	58.3463	2.00861	53.5212	58.3736	64.7264
Scenario_5	SIMULATION	31.8781	3.42269	22.892	31.7627	39.737
Scenario_5	TRUE	31.597	2.71402	23.9511	31.3933	39.2114
Scenario_6	SIMULATION	79.9221	2.90311	73.3568	79.5776	87.5897
Scenario_6	TRUE	79.4613	0.584997	77.7014	79.563	80.5679
Scenario_7	SIMULATION	44.2536	2.67025	36.9982	44.2674	50.7105
Scenario_7	TRUE	43.5	1.50337	40.2789	43.6242	47.1435
The neighbourhood component
Scenario_0	SIMULATION	0.446625	0.237257	0.0809654	0.416138	1.46711
Scenario_0	TRUE	0.392158	0.18887	0.133007	0.354465	0.912242
Scenario_1	SIMULATION	0.313126	0.0499494	0.20361	0.308396	0.447408
Scenario_1	TRUE	0.301236	0.0105917	0.274389	0.300327	0.333507
Scenario_2	SIMULATION	7.5383	2.30664	4.16836	7.04159	15.923
Scenario_2	TRUE	7.4367	2.18423	4.27692	6.93302	15.4866
Scenario_3	SIMULATION	29.6698	2.17057	24.4687	29.3976	34.6419
Scenario_3	TRUE	29.5718	1.4838	26.5258	29.6272	34.461
Scenario_4	SIMULATION	35.726	2.99061	30.2721	35.3926	45.8318
Scenario_4	TRUE	35.8099	1.96633	29.5505	35.7185	40.531
Scenario_5	SIMULATION	33.8994	3.36436	25.9013	34.2001	41.365
Scenario_5	TRUE	33.6724	2.6167	26.587	33.7319	40.8057
Scenario_6	SIMULATION	12.5301	1.54313	8.43304	12.6816	16.4228
Scenario_6	TRUE	12.4373	0.487339	11.6059	12.343	13.9301
Scenario_7	SIMULATION	16.7592	1.91138	12.1638	16.6147	20.765
Scenario_7	TRUE	16.7993	1.11726	14.0861	16.8048	19.2838

## Sheet: Appendix Table A2
Appendix Table A2: Summary of the absolute difference and the squared absolute difference of the component contribution in percentage between the estimates from the fitted model with simulated data and from the true
Component		Scenario_0	Scenario_1	Scenario_2	Scenario_3	Scenario_4	Scenario_5	Scenario_6	Scenario_7
Absolute difference
Autoregressive	Mean	-0.208811	-0.159089	-0.747835	-0.596936	-0.158227	-0.508157	-0.553578	-0.713582
	SD	0.569181	2.91478	2.41948	2.25179	2.65599	2.19699	2.24422	2.15845
	Median	-0.0927851	-0.0306865	-0.937823	-0.800058	-0.209179	-0.533491	-0.74844	-0.702405
	Min	-1.7925	-7.3199	-6.69469	-5.29834	-5.6712	-5.82302	-6.94292	-5.22129
	Max	1.3483	7.77534	5.75423	5.27271	9.41764	5.84342	3.66879	4.89593
	IQR	0.587514	3.88818	2.99308	3.1578	2.83608	2.92369	3.28899	3.01153
	2.5% quantile	-1.48766	-6.16902	-4.98252	-4.97466	-5.2379	-4.2402	-5.31763	-4.04906
	97.5% quantile	0.807008	5.02235	3.7649	3.59033	5.03857	3.75651	3.41675	3.89516
	Range min-max	3.1408	15.0952	12.4489	10.571	15.0888	11.6664	10.6117	10.1172
Neighbourhood	Mean	0.0544668	0.0118899	0.101599	0.0980144	-0.0839714	0.227036	0.0928239	-0.0401095
	SD	0.113639	0.0505343	0.396125	1.43845	2.10458	1.82686	1.37146	1.48471
	Median	0.0333163	0.0109148	0.0411092	0.113376	-0.218219	0.0545305	0.109316	-0.221001
	Min	-0.133551	-0.0969732	-0.925133	-3.28127	-4.63711	-4.31014	-3.37549	-3.13321
	Max	0.601511	0.157172	1.11922	3.89007	5.30078	4.83212	3.49302	3.37021
	IQR	0.126697	0.0702792	0.541426	1.82481	3.01605	2.53464	1.64726	2.04964
	2.5% quantile	-0.100844	-0.0801883	-0.557061	-2.38797	-3.67791	-2.97878	-2.76644	-2.92188
	97.5% quantile	0.321418	0.102134	0.946387	2.88018	3.87009	3.73563	2.58546	2.1948
	Range min-max	0.735062	0.254146	2.04436	7.17134	9.93789	9.14226	6.86851	6.50341
Endemic	Mean	0.154344	0.147199	0.646236	0.498922	0.242199	0.281121	0.460755	0.753691
	SD	0.528266	2.91491	2.35532	1.9618	1.7258	1.31686	2.61691	2.05249
	Median	0.0702865	0.0314796	0.560863	0.742834	0.391375	0.27475	-0.0407751	0.988609
	Min	-1.30544	-7.80751	-5.79715	-4.50584	-4.90626	-3.66944	-5.50326	-5.03125
	Max	1.60072	7.24105	6.89565	4.38973	3.96734	3.00932	7.74531	6.12819
	IQR	0.596182	3.87757	3.08028	2.83445	2.25618	1.76324	3.47432	2.65365
	2.5% quantile	-0.796177	-4.96183	-3.42215	-3.54197	-3.4541	-2.23299	-4.26166	-3.18739
	97.5% quantile	1.331	6.14087	4.91317	3.77301	3.2277	2.83084	5.54217	3.99146
	Range min-max	2.90616	15.0486	12.6928	8.89557	8.8736	6.67876	13.2486	11.1594
Squared absolute difference
Autoregressive	Mean	0.364329	8.43632	6.35458	5.3762	7.00878	5.03671	5.29261	5.12153
	SD	0.622188	12.1119	8.47397	6.63245	11.8711	6.80422	7.81442	6.0999
	Median	0.120223	3.72362	2.34238	2.95504	2.38897	1.8452	2.47752	2.5596
	Min	5.20349e-07	7.12018e-05	9.49514e-05	0.000630472	0.000246128	6.59834e-05	0.000262765	0.00253681
	Max	3.21304	60.456	44.8189	28.0724	88.6919	34.1456	48.2042	27.2618
	IQR	0.380451	8.85301	7.49171	6.28991	6.61725	7.06887	5.08352	8.48783
	2.5% quantile	4.341e-05	0.0234956	0.00885949	0.00860215	0.00442791	0.00350479	0.00915308	0.0385093
	97.5% quantile	2.21426	42.4182	28.4803	26.9603	28.782	24.5164	28.4734	22.1028
	Range min-max	3.21304	60.4559	44.8188	28.0718	88.6916	34.1455	48.2039	27.2593
Neighbourhood	Mean	0.0157512	0.00266955	0.165668	2.05804	4.39203	3.3556	1.87071	2.18394
	SD	0.0414365	0.00364422	0.241646	2.80464	5.39649	4.34823	2.59401	2.56471
	Median	0.00309314	0.0012958	0.0769469	0.845928	2.31787	1.8394	0.769469	1.20774
	Min	1.54531e-06	1.91748e-10	1.35357e-05	0.000492287	0.000294613	0.000660811	0.000276075	0.0157484
	Max	0.361816	0.0247032	1.25266	15.1326	28.0983	23.3494	12.2012	11.3583
	IQR	0.0122683	0.0034681	0.178171	2.77898	5.46069	3.6845	2.06095	2.61134
	2.5% quantile	3.36456e-05	6.7039e-07	7.45571e-05	0.00107395	0.00240839	0.0120065	0.00483236	0.0644699
	97.5% quantile	0.103331	0.0104389	0.937209	9.79518	20.9564	16.2618	10.3644	9.37145
	Range min-max	0.361814	0.0247032	1.25265	15.1321	28.098	23.3487	12.2009	11.3425
Endemic	Mean	0.300096	8.43337	5.90968	4.0591	3.00725	1.79581	6.99205	4.73862
	SD	0.491796	12.0588	8.28988	4.73504	4.19099	2.47039	9.60873	6.08922
	Median	0.0818089	3.75948	2.45279	2.11407	1.32018	0.846873	3.24088	2.39866
	Min	1.18117e-07	0.000536206	0.00027074	0.00165909	7.07699e-05	3.25493e-05	6.79778e-05	3.12231e-06
	Max	2.5623	60.9572	47.5499	20.3026	24.0714	13.4648	59.9898	37.5547
	IQR	0.359339	8.77607	6.58444	5.37096	3.58542	1.96519	8.17612	5.98318
	2.5% quantile	0.000113522	0.0120994	0.00879517	0.00399731	0.00691601	0.00235438	0.00322879	0.0069908
	97.5% quantile	1.82756	42.1068	26.0624	17.4359	14.4334	8.65965	30.8537	18.5129
	Range min-max	2.5623	60.9567	47.5496	20.301	24.0714	13.4647	59.9897	37.5547

## Sheet: Appendix Table A3
Appendix Table A3: Summary of the point estimates across converged models fitted with simulated datasets. The information in the "TRUE" column are retrieved from Table 3 in the main manuscript.
Scenario	Parameter	TRUE	Point estimate summary
			MEDIAN	Median of the difference	Median of the squared difference	Mean	SD	Min	Max	2.5% quantile	97.5% quantile	IQR	Range Min-max
Scenario_0	ar.1	-0.0382628	-0.0333455	-0.00491736	0.00412316	-0.0446775	0.0969486	-0.33465	0.191576	-0.224237	0.163599	0.116136	0.526226
Scenario_1	ar.1	-1.5	-1.57459	0.0745864	0.0640412	-1.58238	0.359955	-2.29678	-0.630678	-2.14558	-0.797063	0.527152	1.6661
Scenario_2	ar.1	-0.8	-0.822178	0.0221783	0.0185783	-0.816921	0.199517	-1.26893	-0.385777	-1.18226	-0.42713	0.273485	0.883151
Scenario_3	ar.1	-3	-2.96502	-0.0349834	3.44128	77.5584	822.075	-76.5509	8215.53	-16.7018	4.70016	3.70014	8292.09
Scenario_4	ar.1	-2.9	-3.309	0.409005	2.12168	-5.72039	15.5592	-151.847	1.23485	-16.7677	0.243491	3.04752	153.081
Scenario_5	ar.1	-1.1	-1.18742	0.0874157	0.0471777	-1.19437	0.336203	-2.11517	-0.445187	-1.75188	-0.517077	0.45263	1.66998
Scenario_6	ar.1	-2.6	-2.99546	0.395463	0.853561	-3.21562	2.08895	-16.1264	3.007	-6.64679	-0.562546	2.17482	19.1334
Scenario_7	ar.1	-1	-0.984176	-0.0158242	0.036647	-1.03983	0.282769	-1.80854	-0.428875	-1.69122	-0.580368	0.389178	1.37966
Scenario_0	ar.log_pop	0.00186275	0.0029777	-0.00111495	1.72189e-05	0.00174874	0.00590095	-0.0134803	0.0190639	-0.00783893	0.0114657	0.00849892	0.0325442
Scenario_1	ar.log_pop	0.00186275	0.00575976	-0.00389701	0.00022831	0.00505762	0.0212906	-0.0496539	0.0428749	-0.0391488	0.0368069	0.0281242	0.0925289
Scenario_2	ar.log_pop	0.00186275	0.00311886	-0.0012561	8.58838e-05	0.00251477	0.0128893	-0.0294234	0.0350845	-0.0191358	0.0286875	0.0186655	0.0645078
Scenario_3	ar.log_pop	0.00186275	0.00682237	-0.00495962	0.0101633	-7.74217	77.8108	-778.057	3.03404	-0.676985	0.318311	0.199105	781.091
Scenario_4	ar.log_pop	0.00186275	0.026154	-0.0242912	0.00576406	0.0884884	0.620512	-0.470213	6.02845	-0.373693	0.364597	0.138914	6.49867
Scenario_5	ar.log_pop	0.00186275	0.00752794	-0.00566519	0.00015508	0.00646509	0.0184681	-0.0532389	0.0508864	-0.0347101	0.0368022	0.0226448	0.104125
Scenario_6	ar.log_pop	0.00186275	0.0087734	-0.00691065	0.00257633	0.0280131	0.105429	-0.371743	0.510203	-0.126364	0.214137	0.118341	0.881946
Scenario_7	ar.log_pop	0.00186275	0.00180673	5.60215e-05	0.000108219	0.00452026	0.0168909	-0.0294197	0.0568753	-0.0233213	0.036965	0.0217725	0.086295
Scenario_0	ar.log_susceptible	-0.0526086	-0.0495885	-0.00302011	0.000123103	-0.0478543	0.0173175	-0.0903326	0.00250143	-0.0818677	-0.0151817	0.0207027	0.092834
Scenario_1	ar.log_susceptible	-0.0526086	-0.0406326	-0.011976	0.00227802	-0.0262323	0.0868181	-0.182504	0.335818	-0.148261	0.182715	0.0966742	0.518322
Scenario_2	ar.log_susceptible	-0.0526086	-0.0460482	-0.0065604	0.00051195	-0.0401121	0.0344938	-0.10784	0.0557673	-0.0971597	0.0281001	0.0495258	0.163607
Scenario_3	ar.log_susceptible	-0.0526086	-0.0325515	-0.0200571	0.0417666	0.138209	1.47735	-8.315	9.33709	-1.50888	2.63388	0.442594	17.6521
Scenario_4	ar.log_susceptible	-0.0526086	-0.0233864	-0.0292222	0.0303713	0.259994	1.13279	-2.79934	6.69636	-0.584086	3.4349	0.553064	9.4957
Scenario_5	ar.log_susceptible	-0.0526086	-0.0471725	-0.00543607	0.0010646	-0.0423696	0.053303	-0.138476	0.149689	-0.123277	0.0786409	0.0728934	0.288166
Scenario_6	ar.log_susceptible	-0.0526086	-0.00638669	-0.0462219	0.0148753	0.223055	1.58801	-0.405305	15.2373	-0.321494	1.5631	0.254288	15.6426
Scenario_7	ar.log_susceptible	-0.0526086	-0.0472854	-0.00532319	0.000707648	-0.0413549	0.047904	-0.11893	0.0992892	-0.115986	0.0786728	0.0551154	0.218219
Scenario_0	ar.stringency	0.000467246	0.000606533	-0.000139288	3.06364e-07	0.000541857	0.000702578	-0.00108607	0.00231085	-0.000757809	0.00172113	0.00106846	0.00339692
Scenario_1	ar.stringency	0.000467246	0.000589762	-0.000122516	1.88206e-06	0.000697899	0.00214454	-0.00404555	0.00691941	-0.00330157	0.00466001	0.00284508	0.010965
Scenario_2	ar.stringency	0.000467246	0.000409648	5.75978e-05	1.14248e-06	0.000497258	0.001531	-0.00291263	0.00444994	-0.00235163	0.00344	0.00208214	0.00736257
Scenario_3	ar.stringency	0.000467246	5.48744e-06	0.000461758	0.000117091	-0.00247787	0.03802	-0.212964	0.173535	-0.0530255	0.0697077	0.0217533	0.3865
Scenario_4	ar.stringency	0.000467246	-0.000129243	0.000596488	0.000107532	0.0034986	0.0416163	-0.130722	0.291916	-0.0394728	0.106435	0.0198793	0.422637
Scenario_5	ar.stringency	0.000467246	0.000823217	-0.000355971	2.95108e-06	0.000582419	0.00248215	-0.00510553	0.00583595	-0.00437796	0.00467388	0.00320491	0.0109415
Scenario_6	ar.stringency	0.000467246	0.000204988	0.000262257	6.44903e-05	-0.000939447	0.0132402	-0.0482822	0.0322165	-0.0279742	0.0228493	0.0154786	0.0804988
Scenario_7	ar.stringency	0.000467246	0.000254214	0.000213031	1.55667e-06	0.000315868	0.00204366	-0.00658123	0.00479038	-0.00338803	0.00413595	0.00248827	0.0113716
Scenario_0	ar.variant_alpha	-0.129203	-0.129026	-0.000176426	0.000350983	-0.127391	0.0331083	-0.239622	-0.0506832	-0.192487	-0.0671749	0.0364507	0.188939
Scenario_1	ar.variant_alpha	-0.129203	-0.110178	-0.0190244	0.0149731	-0.118779	0.201517	-0.795686	0.350219	-0.466317	0.291121	0.243526	1.14591
Scenario_2	ar.variant_alpha	-0.129203	-0.132811	0.00360854	0.0023577	-0.127286	0.0774059	-0.337327	0.0394977	-0.283674	0.0301323	0.091193	0.376825
Scenario_3	ar.variant_alpha	0	0.377583	-0.377583	1.31269	-16.1711	109.788	-993.442	18.4483	-106.314	8.74665	2.24528	1011.89
Scenario_4	ar.variant_alpha	0	0.172614	-0.172614	1.01334	-3.61595	20.0386	-177.164	39.6702	-33.396	5.80222	2.48168	216.834
Scenario_5	ar.variant_alpha	0	-0.0382476	0.0382476	0.0186639	-0.0257977	0.210077	-0.684396	0.565559	-0.384841	0.363041	0.283136	1.24995
Scenario_6	ar.variant_alpha	0	0.20695	-0.20695	0.566035	-0.309004	2.98198	-25.1804	3.34452	-5.9558	1.87983	1.44871	28.5249
Scenario_7	ar.variant_alpha	0	-0.0401784	0.0401784	0.0127815	-0.0352835	0.182476	-0.57114	0.462435	-0.433393	0.310641	0.241055	1.03358
Scenario_0	ar.variant_delta	0.0767544	0.0784983	-0.00174384	0.0006884	0.0790929	0.038026	-0.0433294	0.193166	0.0160455	0.152889	0.0494262	0.236495
Scenario_1	ar.variant_delta	0.0767544	0.109676	-0.0329217	0.0118335	0.108723	0.169878	-0.284735	0.524681	-0.24848	0.484538	0.202101	0.809416
Scenario_2	ar.variant_delta	0.0767544	0.0803257	-0.00357126	0.00401021	0.0823906	0.0937657	-0.159662	0.279881	-0.0936301	0.240502	0.128114	0.439543
Scenario_3	ar.variant_delta	0	0.304299	-0.304299	0.938286	-52.6156	445.46	-4447.15	15.2589	-195.133	8.64269	1.83774	4462.41
Scenario_4	ar.variant_delta	0	0.0246106	-0.0246106	0.672498	0.209687	5.97344	-24.0289	37.5379	-7.44054	10.7178	1.47876	61.5668
Scenario_5	ar.variant_delta	0	0.0140916	-0.0140916	0.016717	-0.0118109	0.177742	-0.614864	0.436819	-0.360759	0.297778	0.252092	1.05168
Scenario_6	ar.variant_delta	0	0.131859	-0.131859	0.341764	-0.56252	3.47124	-26.114	3.37052	-5.403	2.55421	1.1647	29.4846
Scenario_7	ar.variant_delta	0	-0.0110057	0.0110057	0.00970624	-0.0161305	0.153636	-0.39726	0.332311	-0.293737	0.264518	0.196528	0.729571
Scenario_0	ar.variant_omicron	-0.179614	-0.175979	-0.0036347	0.000832993	-0.174706	0.0468739	-0.289127	-0.0458789	-0.266373	-0.0767905	0.056319	0.243248
Scenario_1	ar.variant_omicron	-0.179614	-0.168111	-0.0115033	0.0143881	-0.152877	0.209754	-0.733443	0.279443	-0.638331	0.203748	0.246091	1.01289
Scenario_2	ar.variant_omicron	-0.179614	-0.166126	-0.013488	0.00706079	-0.186007	0.120692	-0.547928	0.0426011	-0.432362	0.00453232	0.166375	0.590529
Scenario_3	ar.variant_omicron	0	-0.233154	0.233154	1.21385	-5.09277	39.2118	-381.008	21.7457	-47.6876	8.63416	2.15982	402.754
Scenario_4	ar.variant_omicron	0	0.080426	-0.080426	0.562606	-4.03468	34.9301	-332.725	38.6019	-27.0094	11.3117	1.64771	371.327
Scenario_5	ar.variant_omicron	0	-0.00987884	0.00987884	0.0158717	-0.00625537	0.177888	-0.522895	0.473407	-0.317174	0.326573	0.248076	0.996302
Scenario_6	ar.variant_omicron	0	0.00954157	-0.00954157	0.307686	-0.0410752	1.263	-7.0414	4.28159	-2.48717	2.11886	1.16556	11.323
Scenario_7	ar.variant_omicron	0	-0.035868	0.035868	0.00864016	-0.0262479	0.150642	-0.406854	0.295012	-0.285844	0.270875	0.158657	0.701865
Scenario_0	end.1	-19.1071	-19.0679	-0.0391666	2.31744	-19.5031	2.98407	-32.5905	-12.6806	-26.0483	-14.3622	2.85981	19.9099
Scenario_1	end.1	-16.1	-16.0989	-0.00107722	0.00109184	-16.1026	0.0491175	-16.2467	-16.012	-16.1978	-16.022	0.0637451	0.234685
Scenario_2	end.1	-16.6	-16.7067	0.106743	0.064294	-16.6959	0.382672	-17.7424	-15.8388	-17.4863	-15.966	0.467382	1.90361
Scenario_3	end.1	-6.4	-6.38645	-0.0135525	0.000745383	-6.39043	0.0396884	-6.4948	-6.3187	-6.47375	-6.32134	0.051719	0.176097
Scenario_4	end.1	-6.5	-6.49478	-0.0052207	0.000719402	-6.49557	0.036022	-6.58238	-6.41735	-6.56338	-6.42523	0.0540168	0.165027
Scenario_5	end.1	-7.1	-7.09672	-0.00328144	0.00116047	-7.09588	0.0472752	-7.25288	-6.98641	-7.16948	-7.00882	0.0674877	0.266472
Scenario_6	end.1	-6.9	-6.89122	-0.00878474	0.000512561	-6.89202	0.0360059	-6.98227	-6.80574	-6.95516	-6.82421	0.0446351	0.176526
Scenario_7	end.1	-6.1	-6.10137	0.00137128	0.00107457	-6.10081	0.0481091	-6.21925	-5.98144	-6.1953	-6.01887	0.0646833	0.237808
Scenario_0	end.log_susceptible	-0.172032	-0.183804	0.0117715	0.00283958	-0.178189	0.0810383	-0.341064	0.0615039	-0.300008	0.0262361	0.108737	0.402567
Scenario_1	end.log_susceptible	-0.172032	-0.174263	0.00223079	0.000264443	-0.172652	0.0233174	-0.226938	-0.110196	-0.215389	-0.126828	0.0328288	0.116742
Scenario_2	end.log_susceptible	-0.172032	-0.171342	-0.000690559	0.000396314	-0.174936	0.026336	-0.235269	-0.114634	-0.227172	-0.130054	0.0397818	0.120635
Scenario_3	end.log_susceptible	-0.172032	-0.172921	0.000888531	0.000215037	-0.170351	0.0216226	-0.216553	-0.122212	-0.208259	-0.128039	0.0297587	0.0943408
Scenario_4	end.log_susceptible	-0.172032	-0.168391	-0.00364111	0.000242699	-0.165356	0.0237714	-0.215211	-0.105408	-0.204176	-0.11793	0.0322315	0.109803
Scenario_5	end.log_susceptible	-0.172032	-0.177914	0.00588114	0.00048873	-0.173649	0.0357975	-0.256306	-0.0724925	-0.243239	-0.10015	0.0415335	0.183813
Scenario_6	end.log_susceptible	-0.172032	-0.170113	-0.00191965	0.000304001	-0.170319	0.0222928	-0.211706	-0.125806	-0.207776	-0.128881	0.034491	0.0858994
Scenario_7	end.log_susceptible	-0.172032	-0.173593	0.00156078	0.000662343	-0.171797	0.0384825	-0.248754	-0.0551572	-0.23877	-0.0919139	0.0532103	0.193597
Scenario_0	end.variant_alpha	-2.30737	-2.59162	0.284255	4.58665	-7.35813	48.7478	-488.092	9.65642	-13.2347	5.65845	4.29853	497.748
Scenario_1	end.variant_alpha	-2.30737	-2.29274	-0.0146308	0.0105138	-2.30575	0.117119	-2.55661	-2.06851	-2.51813	-2.10097	0.204843	0.488094
Scenario_2	end.variant_alpha	-2.30737	-2.24051	-0.0668552	0.103541	-2.20068	0.479188	-3.24201	-0.864731	-3.18329	-1.35415	0.636238	2.37728
Scenario_3	end.variant_alpha	0	-0.00435769	0.00435769	0.00228837	-0.0132789	0.0789452	-0.235988	0.22082	-0.158078	0.119888	0.105725	0.456809
Scenario_4	end.variant_alpha	0	-0.0218119	0.0218119	0.00327295	-0.00642347	0.0762743	-0.236801	0.149696	-0.132308	0.127598	0.0982798	0.386496
Scenario_5	end.variant_alpha	0	-0.00940747	0.00940747	0.00532001	-0.00322427	0.115688	-0.285678	0.331479	-0.235182	0.199993	0.146202	0.617158
Scenario_6	end.variant_alpha	0	-0.0157815	0.0157815	0.00364745	-0.0129171	0.0794565	-0.229804	0.186696	-0.14869	0.134059	0.108702	0.4165
Scenario_7	end.variant_alpha	0	0.0120005	-0.0120005	0.00349738	0.0142802	0.101026	-0.241055	0.298007	-0.169171	0.251511	0.123125	0.539062
Scenario_0	end.variant_delta	8.44365	8.49993	-0.0562892	2.70354	8.82091	2.97107	2.1863	21.9254	3.62884	14.7252	2.9832	19.7391
Scenario_1	end.variant_delta	8.44365	8.4365	0.00714906	0.00195534	8.44113	0.067636	8.26351	8.60328	8.32589	8.57884	0.0874118	0.339771
Scenario_2	end.variant_delta	8.44365	8.57006	-0.126411	0.0719626	8.54764	0.401934	7.63011	9.72124	7.78969	9.37814	0.47371	2.09113
Scenario_3	end.variant_delta	0	-0.00400612	0.00400612	0.00183189	-0.00346672	0.065074	-0.179922	0.166652	-0.126761	0.11998	0.0856416	0.346575
Scenario_4	end.variant_delta	0	0.00335182	-0.00335182	0.0017099	0.00420203	0.0624942	-0.127169	0.178699	-0.105932	0.128345	0.0827439	0.305868
Scenario_5	end.variant_delta	0	-0.00732893	0.00732893	0.00641246	0.000352871	0.0974993	-0.255229	0.22379	-0.176113	0.182644	0.151186	0.479019
Scenario_6	end.variant_delta	0	-0.00930889	0.00930889	0.00233227	-0.00328026	0.0680784	-0.163193	0.163656	-0.127922	0.111229	0.0966241	0.326849
Scenario_7	end.variant_delta	0	0.0104689	-0.0104689	0.00522883	0.0087249	0.101159	-0.255979	0.231455	-0.175468	0.20273	0.136075	0.487435
Scenario_0	end.variant_omicron	10.8824	10.8769	0.00550395	2.56126	11.2678	2.98203	4.48595	24.2182	6.03192	17.7634	2.85753	19.7322
Scenario_1	end.variant_omicron	10.8824	10.8803	0.0020942	0.00138019	10.8842	0.0637496	10.7394	11.0506	10.7563	11.0214	0.0710205	0.311163
Scenario_2	end.variant_omicron	10.8824	10.9598	-0.0774253	0.0677246	10.9805	0.395733	10.134	12.059	10.2352	11.7874	0.540963	1.92499
Scenario_3	end.variant_omicron	0	0.00272649	-0.00272649	0.00204544	0.00282287	0.071401	-0.163194	0.196846	-0.136555	0.130324	0.0881708	0.360041
Scenario_4	end.variant_omicron	0	0.00553819	-0.00553819	0.00170191	0.00994575	0.0668905	-0.182498	0.18528	-0.102041	0.140354	0.0822477	0.367777
Scenario_5	end.variant_omicron	0	0.00471311	-0.00471311	0.00333881	-0.00532131	0.0949047	-0.318829	0.260157	-0.195997	0.170684	0.119835	0.578986
Scenario_6	end.variant_omicron	0	0.00292857	-0.00292857	0.00164909	-0.000101284	0.0666939	-0.154879	0.186723	-0.11152	0.141455	0.0805914	0.341602
Scenario_7	end.variant_omicron	0	0.0300095	-0.0300095	0.00433498	0.0241698	0.111181	-0.310489	0.364406	-0.170143	0.2374	0.133315	0.674895
Scenario_0	ne.1	-13.0944	-13.1664	0.0720318	0.470655	-13.1006	1.15738	-16.9785	-8.68178	-15.44	-11.0066	1.35256	8.2967
Scenario_1	ne.1	-11.9	-11.9098	0.00975696	0.23339	-11.8312	0.730338	-13.3091	-9.7371	-13.1198	-10.2908	0.964744	3.57201
Scenario_2	ne.1	-10	-10.0155	0.0155368	0.0419234	-9.99364	0.292521	-10.6411	-8.97032	-10.5498	-9.44232	0.389207	1.6708
Scenario_3	ne.1	-13.3	-13.3465	0.046452	0.0691845	-13.396	0.472432	-14.7061	-12.2721	-14.4496	-12.5278	0.542254	2.43391
Scenario_4	ne.1	-13.2	-13.2044	0.0043591	0.0341196	-13.1907	0.327391	-14.0904	-12.37	-13.8188	-12.4566	0.37582	1.72041
Scenario_5	ne.1	-13.4	-13.359	-0.0409589	0.0941601	-13.389	0.428843	-14.8224	-12.365	-14.3591	-12.5769	0.569965	2.45742
Scenario_6	ne.1	-13.9	-13.9675	0.0675012	0.120401	-13.988	0.646645	-16.9103	-12.6739	-15.3057	-12.8264	0.763624	4.23639
Scenario_7	ne.1	-13.8	-13.6376	-0.162366	0.152219	-13.6923	0.603798	-15.6059	-12.1428	-14.9562	-12.6436	0.738192	3.46309
Scenario_0	ne.log_pop	0.700923	0.706377	-0.00545323	0.00205079	0.703824	0.0681447	0.446233	0.894995	0.591275	0.841667	0.0934214	0.448762
Scenario_1	ne.log_pop	0.700923	0.69871	0.00221349	0.000642083	0.696149	0.0455197	0.576825	0.792782	0.599923	0.780563	0.0519884	0.215957
Scenario_2	ne.log_pop	0.700923	0.701673	-0.000749439	0.000144146	0.700226	0.0187799	0.639845	0.737511	0.66596	0.734885	0.0238117	0.0976659
Scenario_3	ne.log_pop	0.700923	0.700482	0.000441585	9.4081e-05	0.701871	0.0146016	0.667947	0.75088	0.672767	0.729687	0.0189473	0.0829331
Scenario_4	ne.log_pop	0.700923	0.698195	0.0027286	9.83208e-05	0.697547	0.0149935	0.660891	0.732699	0.671685	0.724229	0.02187	0.0718082
Scenario_5	ne.log_pop	0.700923	0.694267	0.00665654	0.000164029	0.69705	0.018868	0.65174	0.752365	0.664732	0.737591	0.0234754	0.100625
Scenario_6	ne.log_pop	0.700923	0.699532	0.00139112	0.000270965	0.699445	0.0254926	0.640549	0.79851	0.653696	0.739323	0.033276	0.15796
Scenario_7	ne.log_pop	0.700923	0.692547	0.0083762	0.00033238	0.69519	0.0232367	0.631443	0.750628	0.65577	0.736283	0.0323469	0.119185
Scenario_0	ne.stringency	-0.0868376	-0.0877692	0.000931617	1.66365e-05	-0.0877588	0.00771587	-0.106503	-0.0643208	-0.102775	-0.0708011	0.00888098	0.042182
Scenario_1	ne.stringency	-0.0868376	-0.0867551	-8.24998e-05	1.66386e-05	-0.0867367	0.00591942	-0.0980289	-0.0717685	-0.0970003	-0.0747336	0.00830415	0.0262604
Scenario_2	ne.stringency	-0.0868376	-0.0864834	-0.000354158	2.4258e-06	-0.0866756	0.00214714	-0.092401	-0.0825692	-0.0911855	-0.0826606	0.00304095	0.00983181
Scenario_3	ne.stringency	-0.0868376	-0.0859346	-0.000903027	2.10708e-05	-0.0862303	0.00676923	-0.10116	-0.0696892	-0.10036	-0.072781	0.00835414	0.0314705
Scenario_4	ne.stringency	-0.0868376	-0.0858904	-0.000947185	1.58951e-05	-0.0861585	0.00573059	-0.102548	-0.0720805	-0.0990868	-0.0760159	0.00661661	0.0304674
Scenario_5	ne.stringency	-0.0868376	-0.0859348	-0.000902745	1.96719e-05	-0.0861189	0.00653017	-0.102707	-0.0726348	-0.100135	-0.0746033	0.00892053	0.0300719
Scenario_6	ne.stringency	-0.0868376	-0.0852096	-0.00162799	3.87963e-05	-0.0859367	0.0100542	-0.117584	-0.0586883	-0.106393	-0.0692431	0.0115697	0.0588956
Scenario_7	ne.stringency	-0.0868376	-0.0875901	0.000752532	4.45953e-05	-0.0881922	0.0091223	-0.119098	-0.0675581	-0.107759	-0.0744357	0.0130331	0.0515395
Scenario_0	ne.variant_alpha	-3.49195	-3.48029	-0.0116541	0.172741	-3.55666	1.02092	-8.74487	-0.999495	-5.96431	-1.93684	0.812818	7.74538
Scenario_1	ne.variant_alpha	-3.49195	-3.59576	0.103816	0.150591	-13.1079	78.4673	-783.241	-2.52605	-40.6914	-2.69007	0.890219	780.715
Scenario_2	ne.variant_alpha	-3.49195	-3.48486	-0.00708513	0.0202949	-3.51052	0.233381	-4.23829	-2.96644	-4.07135	-3.10896	0.285751	1.27186
Scenario_3	ne.variant_alpha	0	-0.0515153	0.0515153	0.298647	-1.89192	14.9414	-147.697	1.60276	-6.72474	1.43938	1.14145	149.3
Scenario_4	ne.variant_alpha	0	0.0503599	-0.0503599	0.222696	-0.176623	1.34728	-8.22594	1.47696	-2.38829	1.10736	0.919685	9.7029
Scenario_5	ne.variant_alpha	0	-0.0143733	0.0143733	0.380927	-2.37917	16.8743	-166.538	1.56709	-11.1704	1.16755	1.19608	168.105
Scenario_6	ne.variant_alpha	0	-0.0378383	0.0378383	0.592355	-12.095	47.3586	-338.929	2.55262	-132.18	1.95958	2.34983	341.481
Scenario_7	ne.variant_alpha	0	0.138128	-0.138128	0.474406	-4.39092	28.348	-278.177	2.24046	-23.2667	1.30594	1.49837	280.417
Scenario_0	ne.variant_delta	-1.96824	-1.93665	-0.0315833	0.0665054	-1.96853	0.4262	-3.08799	-0.610114	-2.92891	-1.28099	0.500398	2.47787
Scenario_1	ne.variant_delta	-1.96824	-1.94588	-0.0223556	0.0390903	-1.96911	0.304918	-2.78599	-1.36059	-2.69231	-1.47097	0.389945	1.4254
Scenario_2	ne.variant_delta	-1.96824	-1.96311	-0.00512574	0.00522895	-1.96663	0.0978222	-2.25464	-1.6734	-2.14625	-1.82032	0.143779	0.581236
Scenario_3	ne.variant_delta	0	-0.0372898	0.0372898	0.0524142	0.0301515	0.361495	-0.841089	1.01515	-0.55218	0.809839	0.461073	1.85624
Scenario_4	ne.variant_delta	0	0.0324359	-0.0324359	0.0251225	0.0114801	0.226164	-0.656014	0.57518	-0.442	0.427164	0.307734	1.23119
Scenario_5	ne.variant_delta	0	0.0124619	-0.0124619	0.0383542	0.0241727	0.268625	-0.609067	0.833534	-0.440799	0.542161	0.395823	1.4426
Scenario_6	ne.variant_delta	0	-0.000207655	0.000207655	0.0751615	0.0972293	0.677122	-1.2601	4.88873	-0.844511	1.00421	0.50462	6.14883
Scenario_7	ne.variant_delta	0	-0.0254917	0.0254917	0.0362668	-0.0166443	0.4496	-1.63868	2.07736	-0.782756	0.978055	0.441196	3.71604
Scenario_0	ne.variant_omicron	-8.53858	-7.79071	-0.747872	2.34554	-10.1361	7.80099	-44.5589	-4.98003	-36.3792	-5.22314	2.51442	39.5789
Scenario_1	ne.variant_omicron	-8.53858	-8.49379	-0.0447961	0.137545	-8.48822	0.500499	-9.61902	-7.50542	-9.34594	-7.5738	0.72111	2.11361
Scenario_2	ne.variant_omicron	-8.53858	-8.49886	-0.0397283	0.0875735	-8.51362	0.454205	-9.59941	-7.52301	-9.45853	-7.72374	0.527603	2.0764
Scenario_3	ne.variant_omicron	0	0.0596856	-0.0596856	0.0505516	0.0784976	0.345983	-0.656777	1.05781	-0.483614	0.809538	0.473417	1.71459
Scenario_4	ne.variant_omicron	0	0.0293723	-0.0293723	0.0215891	0.0384083	0.219136	-0.391631	0.777414	-0.353034	0.465412	0.270343	1.16905
Scenario_5	ne.variant_omicron	0	0.0314331	-0.0314331	0.0430162	0.0446164	0.299408	-0.560671	1.20843	-0.406919	0.615799	0.410988	1.7691
Scenario_6	ne.variant_omicron	0	0.00963082	-0.00963082	0.0690104	0.0979862	0.608016	-0.953039	4.12156	-0.620375	1.24005	0.540375	5.07459
Scenario_7	ne.variant_omicron	0	-0.00187715	0.00187715	0.0503824	-0.000820669	0.416473	-0.812327	1.93213	-0.574941	0.946366	0.48345	2.74446
Scenario_0	neweights.logd	0.0177108	0.0186966	-0.000985798	0.0215871	-0.0260575	0.282682	-1.24734	0.547199	-0.790216	0.384227	0.287511	1.79454
Scenario_1	neweights.logd	0.0177108	0.0155099	0.00220093	0.00946316	0.0103748	0.134726	-0.416152	0.249705	-0.309989	0.237778	0.1953	0.665857
Scenario_2	neweights.logd	0.0177108	0.0235487	-0.00583791	0.0014879	0.0223425	0.0680682	-0.153073	0.203679	-0.0979947	0.149175	0.0759993	0.356752
Scenario_3	neweights.logd	0.0177108	0.0222779	-0.00456705	0.00246484	0.0221196	0.0716483	-0.217647	0.192849	-0.101239	0.158437	0.100229	0.410496
Scenario_4	neweights.logd	0.0177108	0.0210249	-0.00331412	0.00246071	0.0237702	0.0688237	-0.17006	0.184811	-0.0961197	0.165093	0.0959448	0.354872
Scenario_5	neweights.logd	0.0177108	0.0197651	-0.00205428	0.00225487	0.0100114	0.0762193	-0.215569	0.211764	-0.155014	0.130231	0.0972783	0.427334
Scenario_6	neweights.logd	0.0177108	0.0261159	-0.00840504	0.00832028	0.0171363	0.122895	-0.285216	0.28212	-0.22803	0.231648	0.182258	0.567336
Scenario_7	neweights.logd	0.0177108	0.0249654	-0.00725455	0.0073389	0.0170107	0.109785	-0.217243	0.273165	-0.197638	0.202325	0.162455	0.490408
Scenario_0	overdisp	0.238331	0.236452	0.00187938	1.44214e-05	0.236036	0.00504418	0.22346	0.248166	0.22609	0.247364	0.006402	0.0247057
Scenario_1	overdisp	0.238331	0.235713	0.00261876	1.96312e-05	0.236115	0.00602068	0.223379	0.250581	0.224186	0.247632	0.0079513	0.0272022
Scenario_2	overdisp	0.238331	0.23624	0.00209118	1.76465e-05	0.236475	0.00579333	0.223978	0.250487	0.225265	0.246296	0.00741981	0.0265093
Scenario_3	overdisp	0.238331	0.235866	0.00246555	1.40574e-05	0.236183	0.00501959	0.224506	0.249424	0.228102	0.246756	0.00684328	0.0249176
Scenario_4	overdisp	0.238331	0.236264	0.00206767	1.52949e-05	0.236101	0.00527607	0.224699	0.249312	0.227559	0.248515	0.00716272	0.0246134
Scenario_5	overdisp	0.238331	0.236731	0.00160069	1.71522e-05	0.236389	0.00536006	0.225824	0.251416	0.227208	0.248917	0.00739566	0.0255921
Scenario_6	overdisp	0.238331	0.235995	0.00233593	1.1875e-05	0.23626	0.00483039	0.225423	0.249398	0.227163	0.246769	0.00590948	0.0239748
Scenario_7	overdisp	0.238331	0.23608	0.00225133	1.27283e-05	0.23641	0.00505425	0.225359	0.253612	0.228386	0.247733	0.00654633	0.0282524

## Sheet: Appendix Table A4
Appendix Table A4: Number of converged models and that the summary of the 95%CIs of the parameter estimates contain the ”true” point estimates
Scenario	Parameter	Number of models within CI	Percentage of models within CI	95% CI width
				Mean	SD	Median	Min	Max	IQR	Range min-max
Scenario_0	ar.1	94	94	0.378337	0.0150011	0.376323	0.341103	0.419885	0.0165704	0.078782
Scenario_1	ar.1	97	97	1.45573	0.0853714	1.44899	1.28143	1.73104	0.105419	0.449614
Scenario_2	ar.1	94	94	0.761399	0.0308679	0.763909	0.673285	0.861029	0.0392146	0.187744
Scenario_3	ar.1	88	88	397.575	3598.43	7.54443	3.51782	33769.4	6.18593	33765.9
Scenario_4	ar.1	93	93	13.878	43.709	6.83286	3.71726	413.446	4.30814	409.728
Scenario_5	ar.1	92	92	1.20662	0.0751617	1.20931	1.03353	1.37721	0.115827	0.343686
Scenario_6	ar.1	94	94	5.73966	2.09905	5.04261	2.90104	17.7036	2.14221	14.8025
Scenario_7	ar.1	94	94	1.08225	0.0745921	1.07144	0.938475	1.25779	0.103712	0.319313
Scenario_0	ar.log_pop	97	97	0.023474	0.000934821	0.0233708	0.0212164	0.0263459	0.0011351	0.00512948
Scenario_1	ar.log_pop	97	97	0.0853191	0.00551679	0.0851444	0.0734106	0.102713	0.00776756	0.0293025
Scenario_2	ar.log_pop	93	93	0.0468744	0.00176909	0.0468473	0.0424245	0.050824	0.00272306	0.0083995
Scenario_3	ar.log_pop	88	88	36.9423	340.684	0.394842	0.212182	3196.51	0.204755	3196.3
Scenario_4	ar.log_pop	95	95	0.642163	1.77011	0.377944	0.206989	17.5179	0.197986	17.3109
Scenario_5	ar.log_pop	94	94	0.0699221	0.00422707	0.0698817	0.0610437	0.0821008	0.00626573	0.0210571
Scenario_6	ar.log_pop	94	94	0.317845	0.108116	0.294269	0.174388	0.793161	0.119145	0.618773
Scenario_7	ar.log_pop	94	94	0.0621364	0.00406261	0.0613776	0.0555861	0.0719303	0.00586961	0.0163442
Scenario_0	ar.log_susceptible	93	93	0.0647405	0.0100184	0.0635603	0.0485857	0.112387	0.0130012	0.0638016
Scenario_1	ar.log_susceptible	92	92	0.285872	0.0898846	0.265951	0.158457	0.601906	0.112557	0.443449
Scenario_2	ar.log_susceptible	98	98	0.154645	0.0421943	0.149192	0.100841	0.455003	0.0308264	0.354162
Scenario_3	ar.log_susceptible	91	91	2.59881	5.08741	0.966902	0.315344	36.2035	1.59158	35.8881
Scenario_4	ar.log_susceptible	91	91	2.24589	5.52087	0.905665	0.277621	50.0905	1.30988	49.8129
Scenario_5	ar.log_susceptible	93	93	0.195057	0.0462469	0.192718	0.118447	0.30579	0.0718823	0.187342
Scenario_6	ar.log_susceptible	88	88	1.50103	4.1741	0.744074	0.287963	37.9407	0.577822	37.6527
Scenario_7	ar.log_susceptible	91	91	0.187466	0.0456553	0.178322	0.111209	0.362005	0.0568233	0.250796
Scenario_0	ar.stringency	98	98	0.00287592	7.81944e-05	0.00286992	0.00272543	0.0031512	0.000110747	0.000425773
Scenario_1	ar.stringency	98	98	0.00986142	0.000530148	0.00985018	0.00885361	0.0117428	0.000688275	0.00288919
Scenario_2	ar.stringency	96	96	0.0058322	0.000195928	0.00584534	0.00533848	0.00629433	0.000263495	0.00095585
Scenario_3	ar.stringency	94	94	0.0708995	0.0568684	0.0549363	0.0242746	0.425321	0.0322831	0.401046
Scenario_4	ar.stringency	92	92	0.0653897	0.0837898	0.048207	0.0253569	0.745397	0.0229656	0.72004
Scenario_5	ar.stringency	94	94	0.00891585	0.000490255	0.0089417	0.00778946	0.0101922	0.000724495	0.00240277
Scenario_6	ar.stringency	97	97	0.0436174	0.0183135	0.0387385	0.0221853	0.162926	0.0156227	0.140741
Scenario_7	ar.stringency	95	95	0.00821128	0.000501645	0.00821014	0.00722193	0.00953775	0.000642906	0.00231582
Scenario_0	ar.variant_alpha	97	97	0.138679	0.00411079	0.138649	0.130269	0.147435	0.00568272	0.0171662
Scenario_1	ar.variant_alpha	93	93	0.846263	0.0714989	0.840152	0.712361	1.11302	0.0778037	0.400656
Scenario_2	ar.variant_alpha	95	95	0.311477	0.0255853	0.3096	0.256856	0.377038	0.0307893	0.120182
Scenario_3	ar.variant_alpha	96	96	87.4081	423.631	5.59557	1.90658	3380.08	9.55103	3378.18
Scenario_4	ar.variant_alpha	92	92	26.07	71.9304	4.98132	1.61164	575.388	6.75933	573.776
Scenario_5	ar.variant_alpha	96	96	0.773582	0.0891296	0.762255	0.602884	1.04171	0.127934	0.438823
Scenario_6	ar.variant_alpha	93	93	6.67471	11.0613	3.4	1.53951	84.3445	2.68696	82.805
Scenario_7	ar.variant_alpha	92	92	0.693752	0.0751693	0.690252	0.511771	0.898512	0.0886082	0.38674
Scenario_0	ar.variant_delta	94	94	0.15161	0.00707115	0.151244	0.138511	0.180674	0.00897946	0.042163
Scenario_1	ar.variant_delta	96	96	0.736918	0.0801338	0.732693	0.566675	1.0087	0.0881693	0.442025
Scenario_2	ar.variant_delta	97	97	0.364134	0.022809	0.36187	0.326993	0.485911	0.025048	0.158918
Scenario_3	ar.variant_delta	100	100	234.688	1816.91	4.78143	1.87741	18121.4	11.8028	18119.6
Scenario_4	ar.variant_delta	98	98	10.2914	18.1524	4.08704	1.90602	113.293	5.4243	111.387
Scenario_5	ar.variant_delta	94	94	0.61577	0.0522469	0.615843	0.503575	0.803749	0.0695147	0.300174
Scenario_6	ar.variant_delta	100	100	5.83922	9.95366	3.10613	1.71578	76.6394	3.34149	74.9236
Scenario_7	ar.variant_delta	92	92	0.552314	0.0424077	0.550899	0.447286	0.652118	0.0568245	0.204832
Scenario_0	ar.variant_omicron	95	95	0.183235	0.00806485	0.183156	0.168326	0.216506	0.0105367	0.04818
Scenario_1	ar.variant_omicron	97	97	0.881441	0.0808659	0.87577	0.744073	1.16215	0.0839435	0.418081
Scenario_2	ar.variant_omicron	95	95	0.459842	0.0308522	0.456371	0.404985	0.657447	0.0359208	0.252462
Scenario_3	ar.variant_omicron	94	94	55.9284	347.031	4.30045	1.89089	3311.52	4.85691	3309.62
Scenario_4	ar.variant_omicron	94	94	31.482	169.896	3.83219	2.03953	1621.11	2.63	1619.07
Scenario_5	ar.variant_omicron	94	94	0.619192	0.0403694	0.619322	0.529959	0.706205	0.0586986	0.176246
Scenario_6	ar.variant_omicron	99	99	4.15832	4.45907	3.00395	1.57567	33.8376	1.29997	32.262
Scenario_7	ar.variant_omicron	96	96	0.561462	0.036969	0.558998	0.482727	0.656933	0.0548662	0.174205
Scenario_0	end.1	91	91	10.4572	3.69526	9.55446	5.04221	28.9441	3.47827	23.9019
Scenario_1	end.1	99	99	0.204677	0.00625075	0.204364	0.19078	0.219124	0.00797543	0.0283437
Scenario_2	end.1	99	99	1.67716	0.187909	1.66078	1.34585	2.1805	0.230742	0.834652
Scenario_3	end.1	77	77	0.126651	0.0209101	0.129268	0.0655991	0.190069	0.0244126	0.12447
Scenario_4	end.1	87	87	0.1305	0.0210105	0.131238	0.0669332	0.170913	0.0258399	0.10398
Scenario_5	end.1	94	94	0.176944	0.00711493	0.176795	0.156398	0.197417	0.00943391	0.0410185
Scenario_6	end.1	91	91	0.13952	0.0181791	0.136633	0.092219	0.201039	0.0211122	0.10882
Scenario_7	end.1	95	95	0.176438	0.00742913	0.17667	0.162554	0.19661	0.00956714	0.0340553
Scenario_0	end.log_susceptible	92	92	0.318243	0.108283	0.293536	0.167902	0.675416	0.0963696	0.507514
Scenario_1	end.log_susceptible	92	92	0.0858837	0.0154684	0.083338	0.0600237	0.122656	0.0217447	0.0626321
Scenario_2	end.log_susceptible	98	98	0.118412	0.0257278	0.114411	0.0819129	0.275088	0.0249835	0.193175
Scenario_3	end.log_susceptible	92	92	0.0764565	0.0207934	0.0693682	0.054195	0.154232	0.0340711	0.100037
Scenario_4	end.log_susceptible	90	90	0.0791626	0.0227231	0.0735187	0.0550929	0.151637	0.0329569	0.0965445
Scenario_5	end.log_susceptible	92	92	0.147168	0.0326202	0.144529	0.0936554	0.243977	0.0396352	0.150322
Scenario_6	end.log_susceptible	96	96	0.0814865	0.0212669	0.0775886	0.051471	0.205079	0.0263338	0.153608
Scenario_7	end.log_susceptible	93	93	0.153372	0.0356047	0.150526	0.0854791	0.263971	0.0406119	0.178492
Scenario_0	end.variant_alpha	95	95	62.0866	449.776	14.2454	6.59303	4399.23	7.04488	4392.64
Scenario_1	end.variant_alpha	100	100	0.502933	0.017032	0.499991	0.471535	0.562924	0.0248838	0.0913886
Scenario_2	end.variant_alpha	98	98	2.04211	0.199082	2.03294	1.69532	2.56832	0.247498	0.872997
Scenario_3	end.variant_alpha	88	88	0.242799	0.0699947	0.24621	0.138701	0.508307	0.0953261	0.369605
Scenario_4	end.variant_alpha	86	86	0.264496	0.0679302	0.25911	0.144759	0.501248	0.0852877	0.356489
Scenario_5	end.variant_alpha	94	94	0.397685	0.0287731	0.399756	0.326195	0.489555	0.0369468	0.16336
Scenario_6	end.variant_alpha	92	92	0.278664	0.0523009	0.274028	0.151529	0.493782	0.0608535	0.342253
Scenario_7	end.variant_alpha	92	92	0.407559	0.0301237	0.40416	0.341425	0.488213	0.0385677	0.146788
Scenario_0	end.variant_delta	91	91	10.5533	3.71803	9.63483	5.1075	29.1033	3.44754	23.9958
Scenario_1	end.variant_delta	97	97	0.281881	0.00818016	0.280976	0.262874	0.313186	0.00857241	0.0503122
Scenario_2	end.variant_delta	97	97	1.71862	0.18831	1.70023	1.38066	2.22776	0.223986	0.847095
Scenario_3	end.variant_delta	88	88	0.216664	0.0445964	0.222435	0.129085	0.317447	0.068815	0.188362
Scenario_4	end.variant_delta	92	92	0.229616	0.0472973	0.23045	0.134267	0.373847	0.0581006	0.239581
Scenario_5	end.variant_delta	93	93	0.345359	0.020523	0.344254	0.291945	0.406296	0.0248914	0.114351
Scenario_6	end.variant_delta	91	91	0.235333	0.0331581	0.237517	0.1409	0.301146	0.0350695	0.160245
Scenario_7	end.variant_delta	94	94	0.351432	0.0220719	0.347114	0.315622	0.415326	0.0255145	0.0997036
Scenario_0	end.variant_omicron	91	91	10.5069	3.6881	9.6645	5.09816	28.9783	3.49841	23.8801
Scenario_1	end.variant_omicron	95	95	0.259077	0.00847426	0.257259	0.241742	0.278025	0.0124721	0.0362829
Scenario_2	end.variant_omicron	99	99	1.69776	0.187509	1.67972	1.36331	2.1987	0.232497	0.835391
Scenario_3	end.variant_omicron	94	94	0.265383	0.0439428	0.263326	0.192072	0.375823	0.0642905	0.183751
Scenario_4	end.variant_omicron	95	95	0.276701	0.0511235	0.270632	0.195141	0.477549	0.0624914	0.282408
Scenario_5	end.variant_omicron	97	97	0.401246	0.0326708	0.396966	0.326623	0.490255	0.0428046	0.163632
Scenario_6	end.variant_omicron	94	94	0.276444	0.0425607	0.272723	0.177789	0.413084	0.0545693	0.235295
Scenario_7	end.variant_omicron	94	94	0.412201	0.0356563	0.404921	0.330224	0.49702	0.0459193	0.166796
Scenario_0	ne.1	95	95	4.04099	0.969114	3.92639	2.28273	6.98579	1.21228	4.70306
Scenario_1	ne.1	95	95	2.90392	0.221736	2.87079	2.38616	3.41411	0.315367	1.02796
Scenario_2	ne.1	96	96	1.16795	0.0410152	1.16903	1.09387	1.28418	0.0627962	0.190307
Scenario_3	ne.1	93	93	1.65344	0.248058	1.58308	1.34384	2.93556	0.196696	1.59172
Scenario_4	ne.1	95	95	1.49829	0.160145	1.46464	1.24342	2.20066	0.181785	0.95724
Scenario_5	ne.1	95	95	1.71515	0.125988	1.70357	1.47999	2.12148	0.184974	0.641493
Scenario_6	ne.1	97	97	2.65798	0.487381	2.55398	1.88325	5.92049	0.45494	4.03723
Scenario_7	ne.1	96	96	2.48152	0.696152	2.38333	1.91865	8.37134	0.304019	6.45269
Scenario_0	ne.log_pop	97	97	0.23759	0.0623688	0.233015	0.136929	0.448459	0.0828942	0.31153
Scenario_1	ne.log_pop	94	94	0.181528	0.0148285	0.181546	0.151568	0.209326	0.0215848	0.0577576
Scenario_2	ne.log_pop	97	97	0.0708448	0.00270437	0.0712057	0.0655409	0.0767602	0.00395678	0.0112193
Scenario_3	ne.log_pop	97	97	0.0646779	0.00938176	0.0636386	0.0499402	0.0941994	0.0105786	0.0442592
Scenario_4	ne.log_pop	96	96	0.0610297	0.0109557	0.0595421	0.0463335	0.119532	0.0105952	0.0731988
Scenario_5	ne.log_pop	93	93	0.0737379	0.00481279	0.0738769	0.0641365	0.0829088	0.00740189	0.0187723
Scenario_6	ne.log_pop	95	95	0.0972266	0.0125072	0.0955144	0.0760608	0.152269	0.012536	0.0762081
Scenario_7	ne.log_pop	96	96	0.0960684	0.00665659	0.0956172	0.0818809	0.111844	0.00963493	0.0299629
Scenario_0	ne.stringency	96	96	0.035384	0.00641818	0.0350908	0.0229042	0.0563591	0.00854114	0.0334549
Scenario_1	ne.stringency	95	95	0.023566	0.00187684	0.023467	0.0193175	0.0295794	0.00215565	0.010262
Scenario_2	ne.stringency	97	97	0.00939413	0.000335584	0.00940913	0.00873878	0.0101994	0.000414558	0.00146065
Scenario_3	ne.stringency	89	89	0.0235724	0.00193064	0.0234108	0.0195774	0.0304006	0.00274841	0.0108233
Scenario_4	ne.stringency	93	93	0.0214638	0.00182635	0.0213309	0.018096	0.0298667	0.00202958	0.0117707
Scenario_5	ne.stringency	93	93	0.0242752	0.00194997	0.0241889	0.0204098	0.0299374	0.00244335	0.00952758
Scenario_6	ne.stringency	92	92	0.0381987	0.00421677	0.0375482	0.0301042	0.0510369	0.00517694	0.0209327
Scenario_7	ne.stringency	96	96	0.0350202	0.00376972	0.0344956	0.0273874	0.0447067	0.00481543	0.0173193
Scenario_0	ne.variant_alpha	92	92	3.301	3.97743	2.17743	1.12642	28.3574	1.30699	27.231
Scenario_1	ne.variant_alpha	97	97	56.0294	479.631	2.31477	1.34785	4724.1	2.12475	4722.76
Scenario_2	ne.variant_alpha	97	97	0.924356	0.21739	0.885352	0.633529	2.03178	0.218065	1.39825
Scenario_3	ne.variant_alpha	93	93	17.8123	117.103	3.55734	1.7276	1131.41	2.4567	1129.68
Scenario_4	ne.variant_alpha	92	92	4.37562	5.22104	2.94526	1.63282	37.2874	2.2421	35.6546
Scenario_5	ne.variant_alpha	92	92	15.9386	65.9757	3.36914	1.48425	601.438	2.86884	599.954
Scenario_6	ne.variant_alpha	96	96	64.6897	201.339	5.40443	2.06056	1369.52	11.4671	1367.46
Scenario_7	ne.variant_alpha	94	94	29.0002	110.62	4.52715	2.20137	944.568	5.04523	942.366
Scenario_0	ne.variant_delta	94	94	1.62357	0.785603	1.45142	0.647722	5.66267	0.732705	5.01495
Scenario_1	ne.variant_delta	95	95	1.1595	0.150507	1.1525	0.906228	1.7138	0.177042	0.807574
Scenario_2	ne.variant_delta	97	97	0.398721	0.0227083	0.396846	0.352969	0.456506	0.0314198	0.103537
Scenario_3	ne.variant_delta	94	94	1.14817	0.313203	1.0416	0.800003	2.51575	0.254094	1.71575
Scenario_4	ne.variant_delta	98	98	0.976624	0.169886	0.94426	0.712671	1.81503	0.19318	1.10235
Scenario_5	ne.variant_delta	98	98	1.10217	0.152215	1.07837	0.831556	1.6728	0.168915	0.84124
Scenario_6	ne.variant_delta	96	96	1.85385	0.616933	1.69411	1.14427	5.63848	0.588149	4.49421
Scenario_7	ne.variant_delta	96	96	1.68721	0.90398	1.53563	1.0523	9.37853	0.414008	8.32623
Scenario_0	ne.variant_omicron	82	82	22.7754	48.5241	6.98682	2.44042	315.149	5.21207	312.708
Scenario_1	ne.variant_omicron	93	93	1.854	0.0764007	1.84011	1.69809	2.09695	0.10623	0.398866
Scenario_2	ne.variant_omicron	91	91	1.64967	0.128009	1.62961	1.23939	2.00156	0.128462	0.762164
Scenario_3	ne.variant_omicron	90	90	1.07008	0.245382	0.988458	0.758579	2.51684	0.227833	1.75826
Scenario_4	ne.variant_omicron	98	98	0.944836	0.149879	0.922019	0.690502	1.53693	0.179801	0.846432
Scenario_5	ne.variant_omicron	96	96	1.07799	0.133098	1.05864	0.864483	1.58649	0.184195	0.722007
Scenario_6	ne.variant_omicron	97	97	1.81133	0.624964	1.65637	1.10328	5.84211	0.483833	4.73883
Scenario_7	ne.variant_omicron	97	97	1.66456	0.886287	1.53872	1.13092	9.29078	0.391975	8.15986
Scenario_0	neweights.logd	94	94	0.972621	0.537054	0.830916	0.427594	3.89017	0.352066	3.46257
Scenario_1	neweights.logd	94	94	0.528848	0.079116	0.527098	0.407071	0.755958	0.112697	0.348887
Scenario_2	neweights.logd	92	92	0.270353	0.01619	0.269802	0.235412	0.311694	0.0194072	0.0762825
Scenario_3	neweights.logd	94	94	0.297025	0.020412	0.29805	0.246424	0.340251	0.0267589	0.0938271
Scenario_4	neweights.logd	92	92	0.274842	0.0197885	0.276683	0.234281	0.333931	0.0244002	0.0996502
Scenario_5	neweights.logd	98	98	0.332534	0.0301339	0.331138	0.280677	0.42327	0.0401999	0.142593
Scenario_6	neweights.logd	97	97	0.487996	0.0493296	0.484969	0.394095	0.63647	0.069944	0.242374
Scenario_7	neweights.logd	99	99	0.453519	0.0520991	0.445758	0.337251	0.606535	0.0660708	0.269283
Scenario_0	overdisp	93	93	0.019799	0.000401006	0.0197922	0.0190044	0.0209598	0.000559503	0.00195544
Scenario_1	overdisp	95	95	0.0247333	0.000555764	0.0246662	0.0236643	0.0261048	0.000745443	0.00244053
Scenario_2	overdisp	88	88	0.0211371	0.000402236	0.0211446	0.0202551	0.0219538	0.000608645	0.00169866
Scenario_3	overdisp	94	94	0.0194539	0.000360489	0.0194296	0.0188643	0.0202749	0.000522356	0.00141055
Scenario_4	overdisp	88	88	0.0194585	0.000336417	0.0194659	0.0188932	0.0203943	0.000498148	0.00150111
Scenario_5	overdisp	91	91	0.0194667	0.000349874	0.0195009	0.0188613	0.0204049	0.000547853	0.00154361
Scenario_6	overdisp	91	91	0.0194774	0.000300831	0.0194524	0.0188965	0.0200934	0.000432547	0.00119693
Scenario_7	overdisp	94	94	0.0194343	0.000342174	0.0194083	0.0188368	0.0203725	0.000465845	0.00153569
